# Supplementary material for: Nanostructured polysilsesquioxanes bearing amine and ammonium groups by micelle templating using anionic surfactants
Source: Royal Society of Chemistry journal article supplement (doi:10.1039/b925352a), 2010-01-01
Supplement: b925352a.pdf [file b925352a.pdf]

# Nanostructured polysilsesquioxanes bearing amine and ammonium groups by micelle templating using anionic surfactants

*Thy Phuong Nguyen, Tran Thi My Linh, Joël J.E. Moreau and Peter Hesemann*

Institut Charles Gerhardt, UMR 5253, 8, rue de l'Ecole Normale, 34296 Montpellier, France

peter.hesemann@enscm.fr

## Table of contents

|                                                                                        |   |
|----------------------------------------------------------------------------------------|---|
| <b>1. Precursor characterization</b> .....                                             | 2 |
| <sup>1</sup> H NMR spectrum of precursor <b>1</b> .....                                | 2 |
| FT-IR spectrum of precursor <b>1</b> .....                                             | 2 |
| <b>2. Materials characterization</b> .....                                             | 3 |
| FT-IR spectrum of material <b>A</b> .....                                              | 3 |
| ATG-plots of materials <b>A</b> , <b>B</b> and <b>C</b> .....                          | 3 |
| BJH dV/dlog(D) Pore Volume Distribution of Materials <b>D</b> and <b>E</b> .....       | 4 |
| Solid state NMR spectra of materials <b>B</b> , <b>C</b> , <b>D</b> and <b>E</b> ..... | 5 |

## 1. Precursor characterization

$^1\text{H}$  NMR spectrum of precursor **1** (solvent:  $\text{CDCl}_3$ )

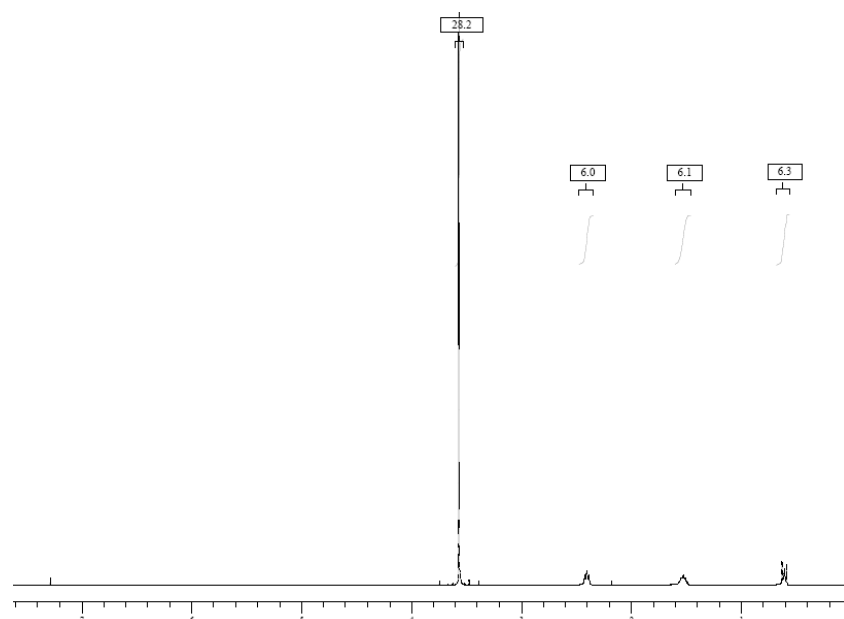

FT-IR spectrum of precursor **1**

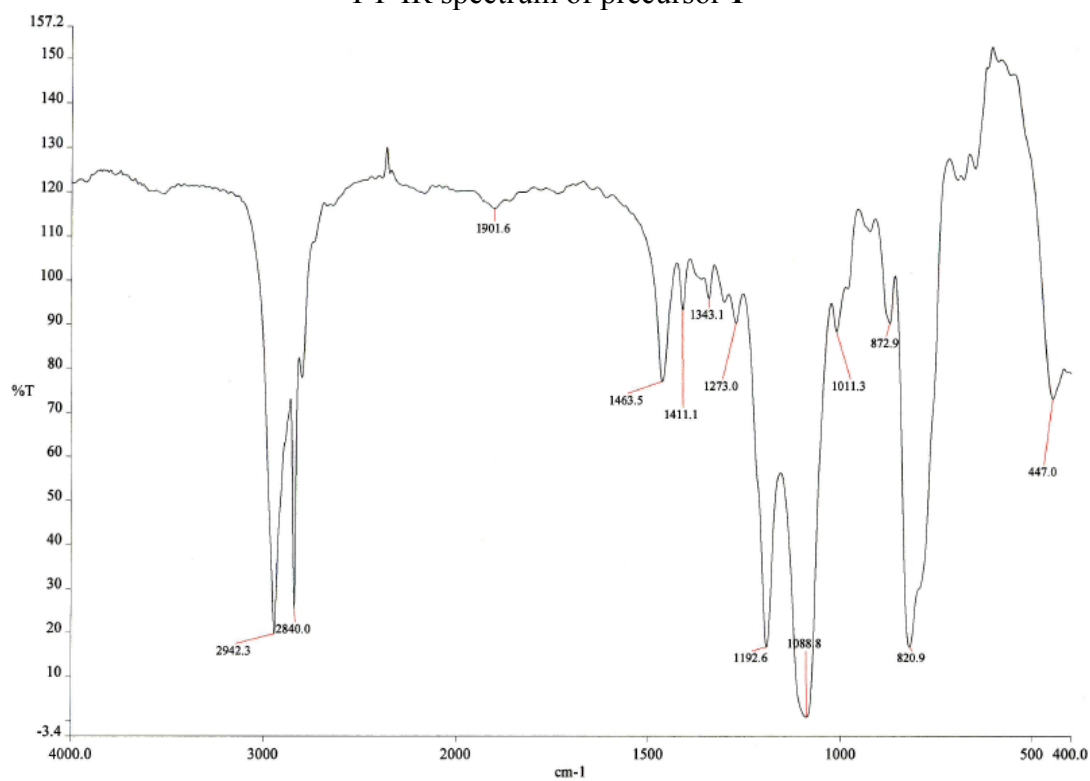

## 2. Materials characterization

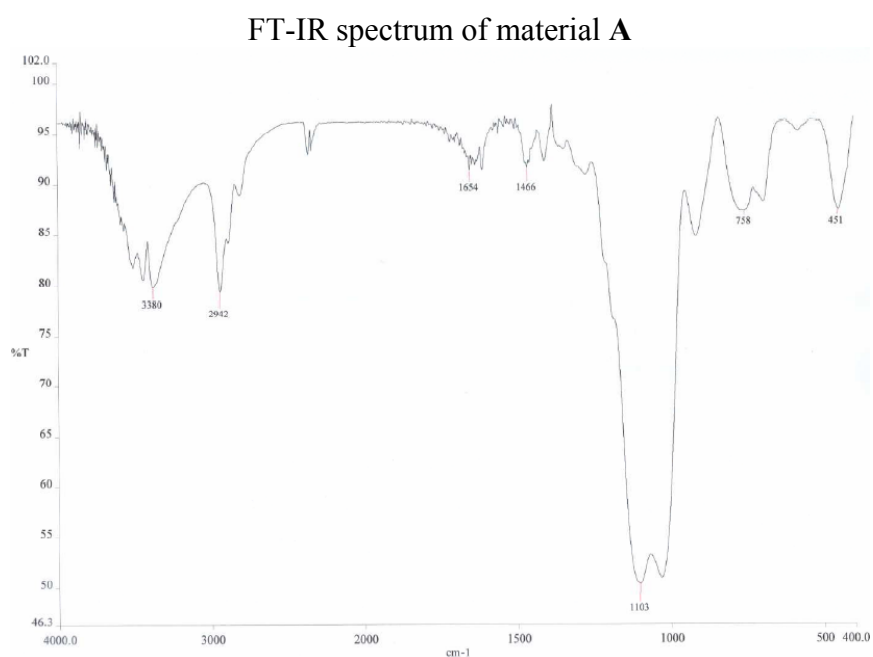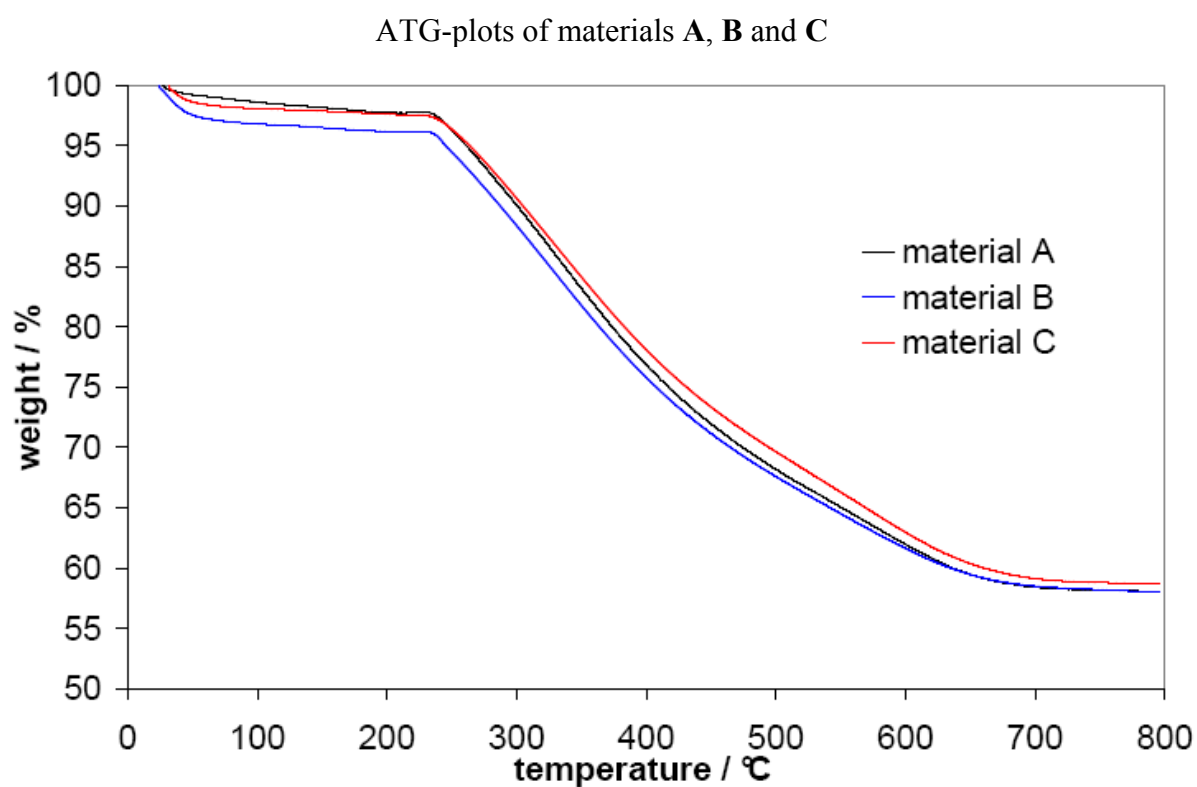

### BJH $dV/d\log(D)$ Pore Volume Distribution of Materials **D** and **E**

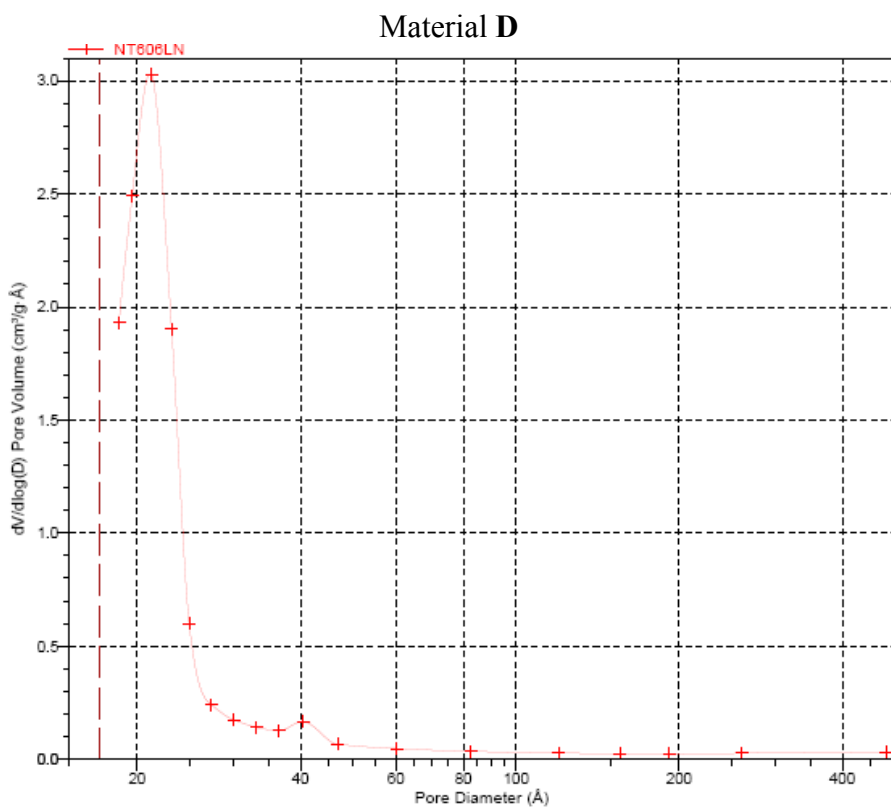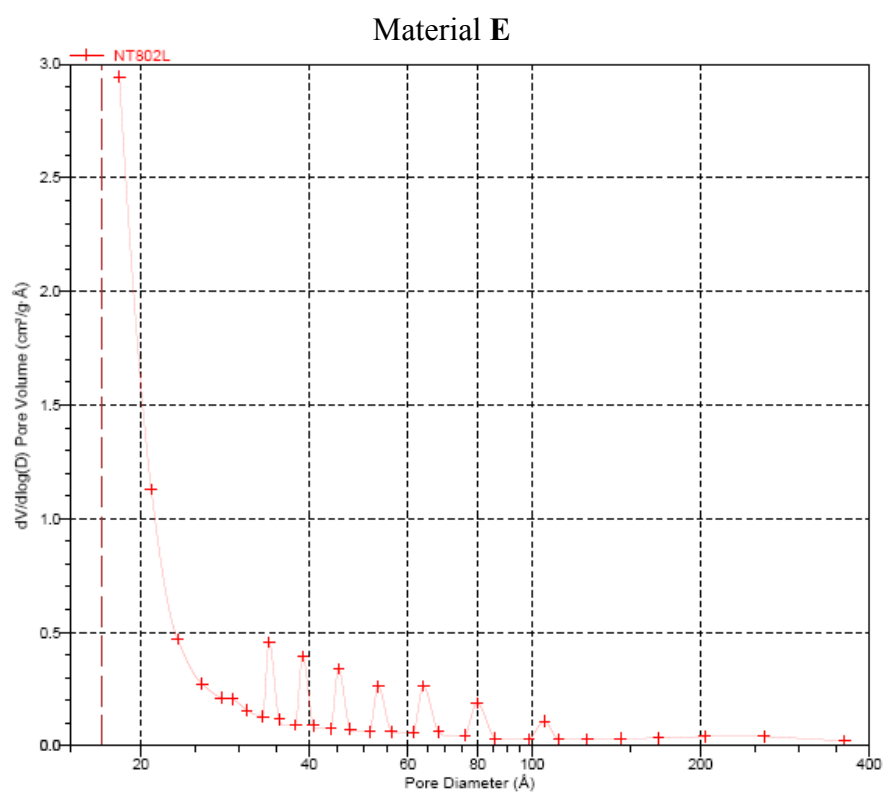

Solid state NMR spectra of materials **B**, **C**, **D** and **E**

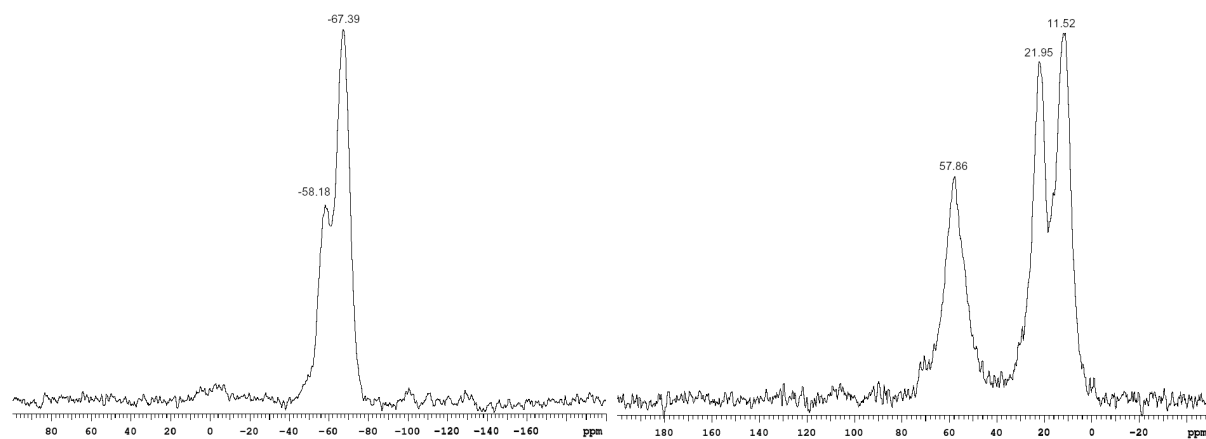

$^{29}\text{Si}$  OP MAS NMR spectrum (left) and  $^{13}\text{C}$  CP MAS NMR spectrum (right) of material **B**, obtained by hydrolysis-polycondensation of the amine precursor **1** under basic reaction conditions in the presence of cationic surfactant (CTAB)

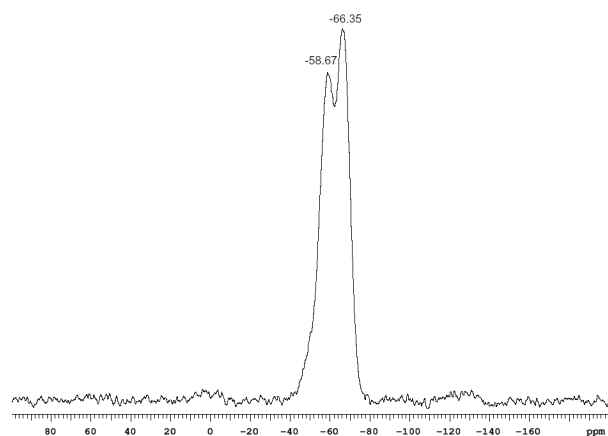

$^{29}\text{Si}$  OP MAS NMR spectrum of material **C**, obtained by hydrolysis-polycondensation of the precursor **1** under acidic reaction conditions in the presence of neutral surfactant (P123)

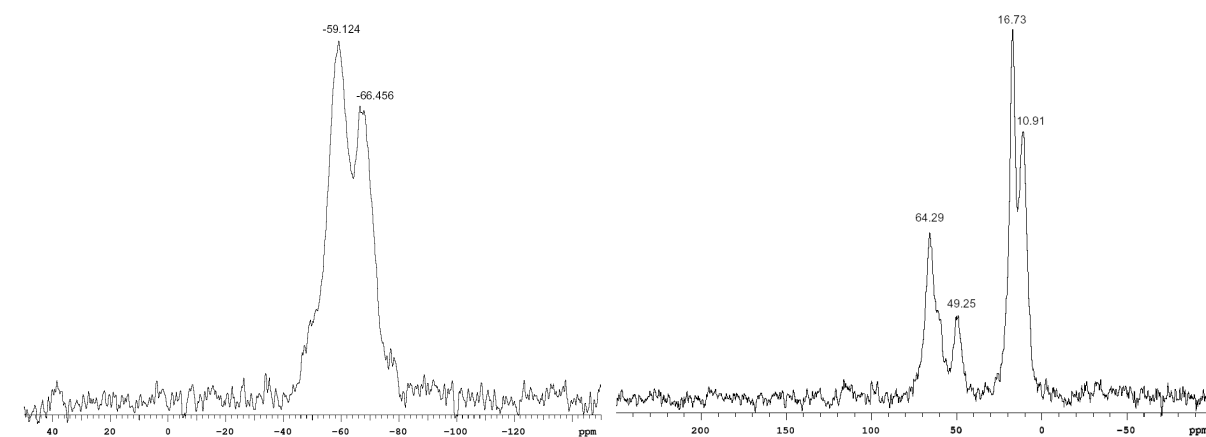

$^{29}\text{Si}$  OP MAS NMR spectrum (left) and  $^{13}\text{C}$  CP MAS NMR spectrum (right) of material **D**, obtained by hydrolysis-polycondensation of the ammonium precursor **2**

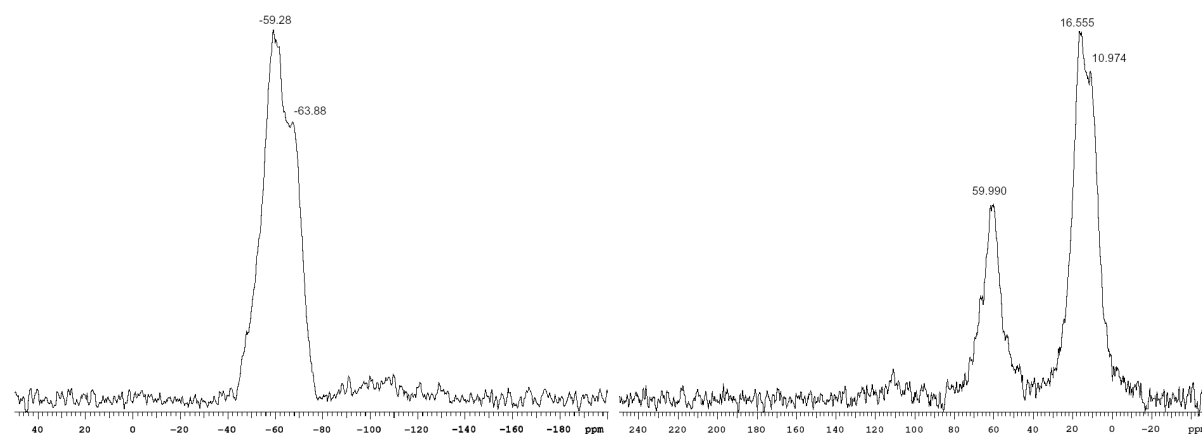

$^{29}\text{Si}$  OP MAS NMR spectrum (left) and  $^{13}\text{C}$  CP MAS NMR spectrum (right) of material **E**, obtained by hydrolysis-polycondensation of the ammonium precursor **3**
